# Supplementary material for: Constructing Cu0/Cu+ interfaces on Cu-based MOF derivatives to promote the adsorption stability of intermediates in the process of CO2 electroreduction to C2 products
Source: Royal Society of Chemistry journal article supplement (doi:10.1039/d4en00466c), 2024-01-01
Supplement: d4en00466c1.pdf [file d4en00466c1.pdf]

## Supporting Information

### **Constructing Cu<sup>0</sup>/Cu<sup>+</sup> interfaces on Cu-based MOFs derivatives to promote the adsorption stability of intermediates in the process of CO<sub>2</sub> electroreduction to C<sub>2</sub> products**

Jingwei Hong,<sup>a</sup> Wanli Li,<sup>a</sup> Jin Shang,<sup>d</sup> Hiromi Yamashita,<sup>e</sup> Yun Hu<sup>\*a,b,c</sup>

<sup>a</sup> School of Environment and Energy, South China University of Technology, Guangzhou 510006, P. R. China

<sup>b</sup> Guangdong Provincial Engineering and Technology Research Centre for Environmental Risk Prevention and Emergency Disposal, Guangzhou 510006, P. R. China

<sup>c</sup> The Key Lab of Pollution Control and Ecosystem Restoration in Industry Clusters, Ministry of Education, Guangzhou 510006, P. R. China

<sup>d</sup> City University of Hong Kong School of Energy and Environment, Tat Chee Avenue, Hong Kong 999077, P. R. China

<sup>e</sup> Division of Materials and Manufacturing Science, Graduate School of Engineering, Osaka University, 2-1 Yamadaoka, Suita, Osaka 565-0871, Japan

\* Corresponding author: Yun Hu; E-mail address: huyun@scut.edu.cn

### ***In situ* ATR-FTIR instruments**

In this study, *in situ* ATR-FTIR tests were performed in a commercially available spectroelectrochemical cell with a three-electrode configuration. First, 20  $\mu\text{L}$  of catalyst ink (1 mg/mL) was uniformly dripped onto the surface of the gold-film electrode and dried at room temperature, and this operation was repeated after it was allowed to dry. Then, the prepared loaded catalyst electrode was used as the working electrode, and the Pt wire and saturated Ag/AgCl electrode were used as the counter electrode and reference electrode, respectively. *In situ* ATR-FTIR tests were carried out on a Nicolet Is50 Fourier Transform Infrared Spectrometer equipped with a spectroscopic component VeeMAX III from PIKE, USA and a liquid nitrogen cooled IR spectrometer detector. The spectroelectrochemical cell was connected to a CHI 660E electrochemical analyzer for electrochemical measurements. Prior to the *in situ* tests, the working electrode to be tested was first electrically reduced in  $\text{CO}_2$ -saturated 0.1 M  $\text{KHCO}_3$  at -0.9 V (relative to Ag/AgCl) for 20 min. background spectra were recorded without applying any potentials or adding any catalysts in order to eliminate the effect of the gold layer. Subsequently, *in situ* spectra of the catalyst-loaded electrodes were recorded at a gradient voltage of -0.5 ~ -1.5 V. To reduce the effect of  $\text{CO}_2$  and water vapor,  $\text{CO}_2$  drumming was stopped during the *in situ* test. The spectral resolution was  $4\text{ cm}^{-1}$  and each spectrum was scanned 10 times.

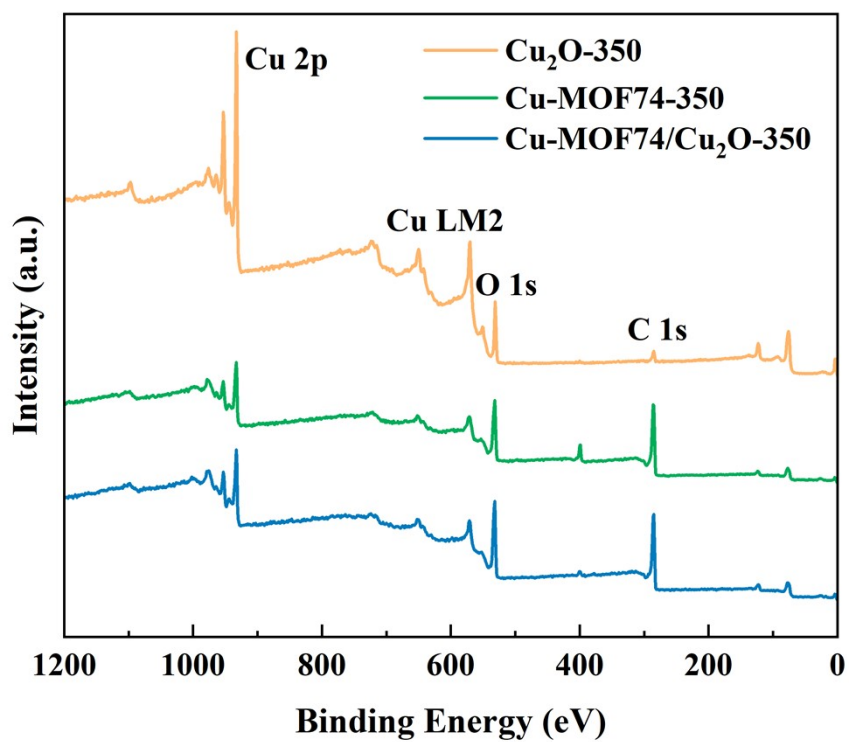

**Fig. S1.** XPS full spectra of Cu<sub>2</sub>O-350, Cu-MOF74-350, and Cu-MOF74/Cu<sub>2</sub>O-350.

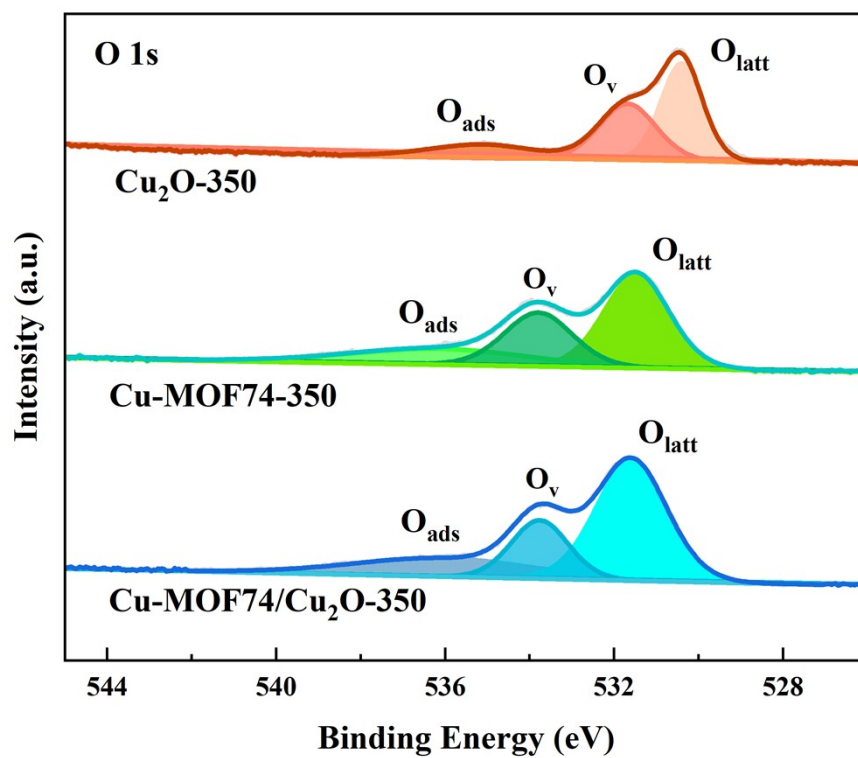

**Fig. S2.** O 1s XPS spectra of Cu<sub>2</sub>O-350, Cu-MOF74-350, and Cu-MOF74/Cu<sub>2</sub>O-350.

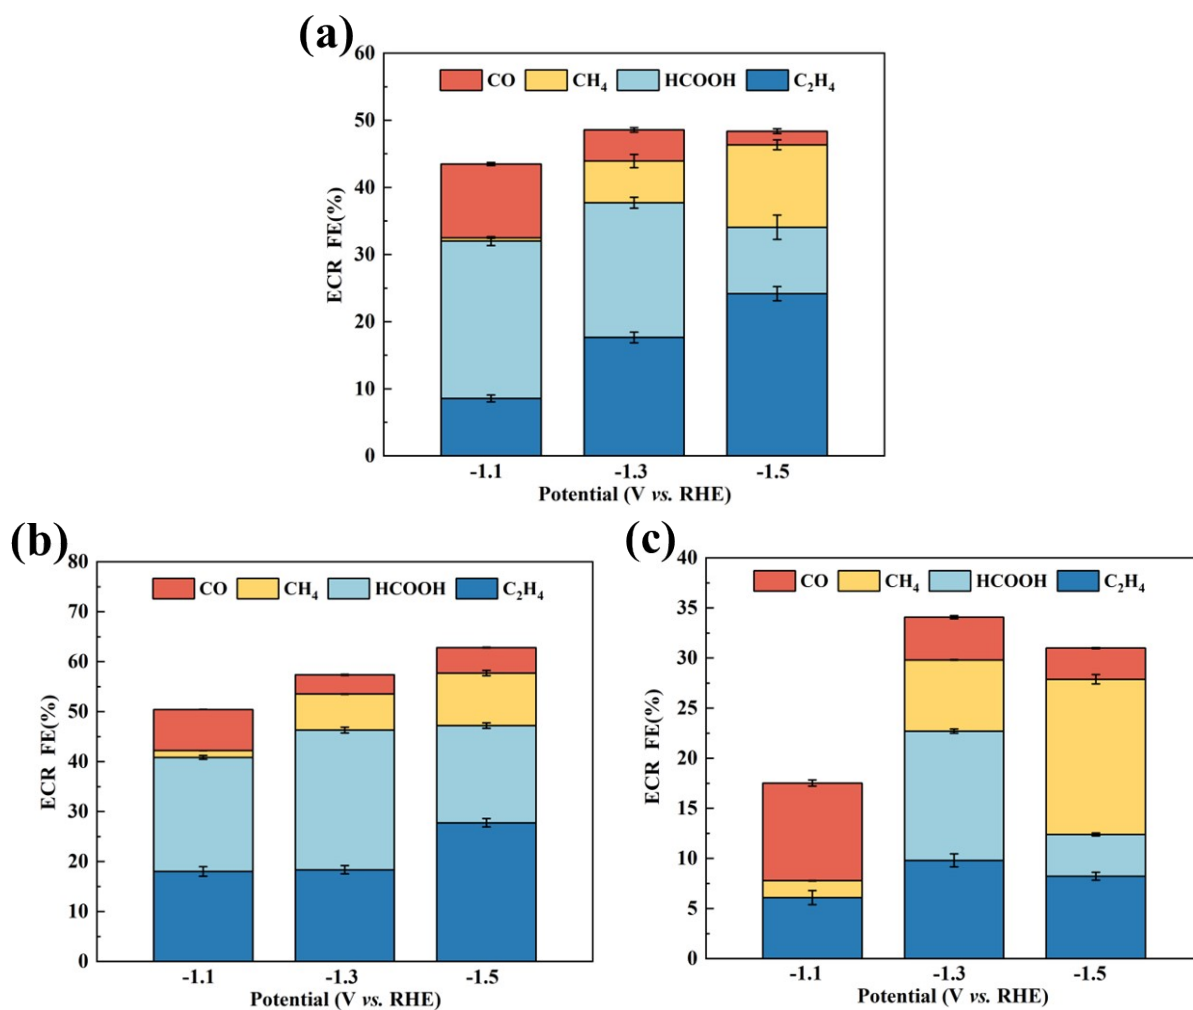

**Fig. S3.** Selectivity of CO<sub>2</sub>RR products measured in 0.1 M KHCO<sub>3</sub> electrolyte under an applied bias of -1.3 V for (a) Cu-MOF74/Cu<sub>2</sub>O, (b) Cu-MOF74/Cu<sub>2</sub>O-250, (c) Cu-MOF74/Cu<sub>2</sub>O-450.

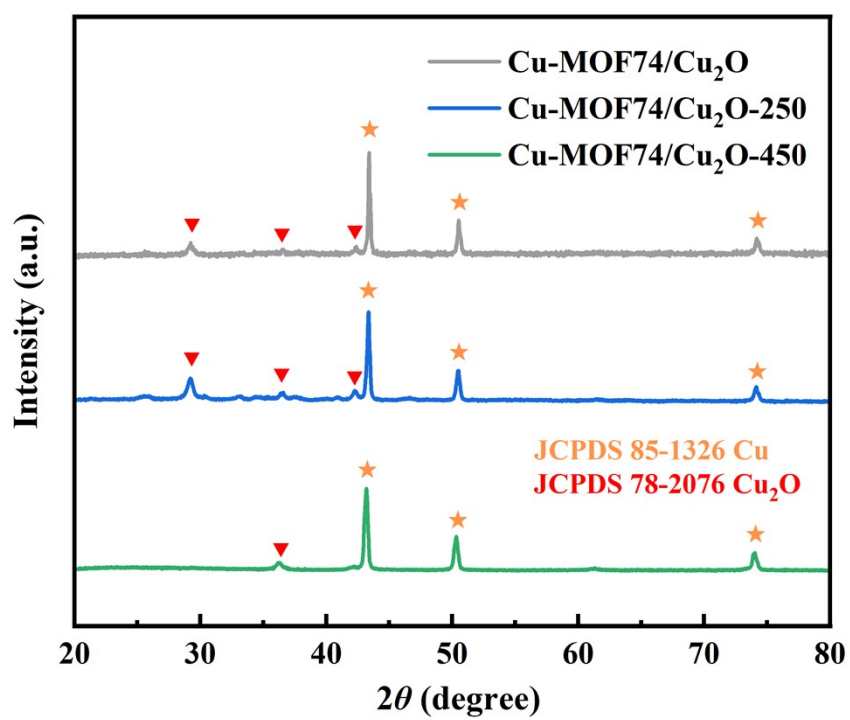

**Fig. S4.** XRD spectra of Cu-MOF74/Cu<sub>2</sub>O, Cu-MOF74/Cu<sub>2</sub>O-250 and Cu-MOF74/Cu<sub>2</sub>O-450.

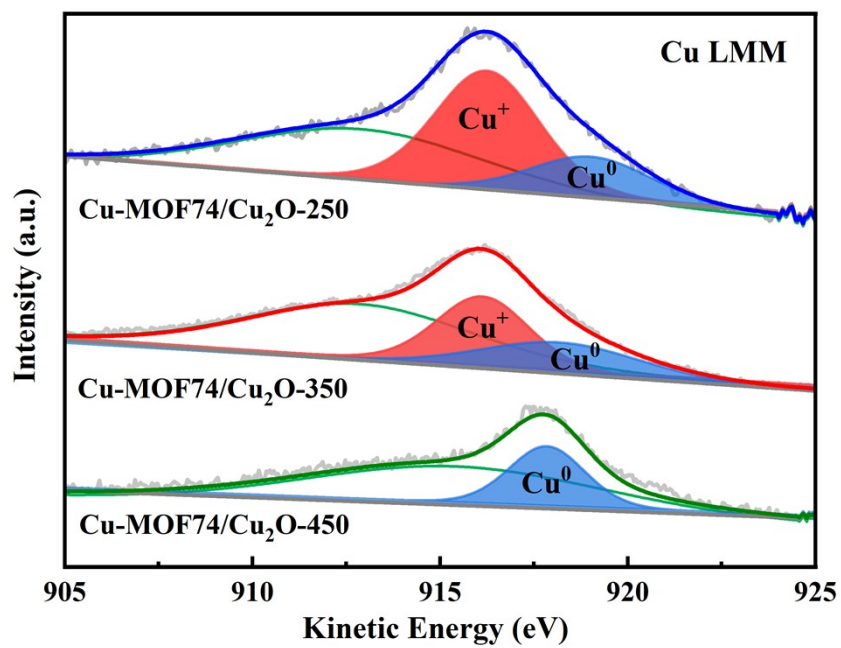

**Fig. S5.** Cu LMM spectra of Cu-MOF74/Cu<sub>2</sub>O-250, Cu-MOF74/Cu<sub>2</sub>O-350, and Cu-MOF74/Cu<sub>2</sub>O-450.

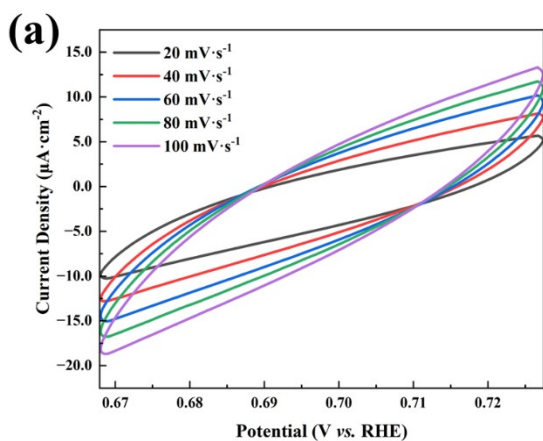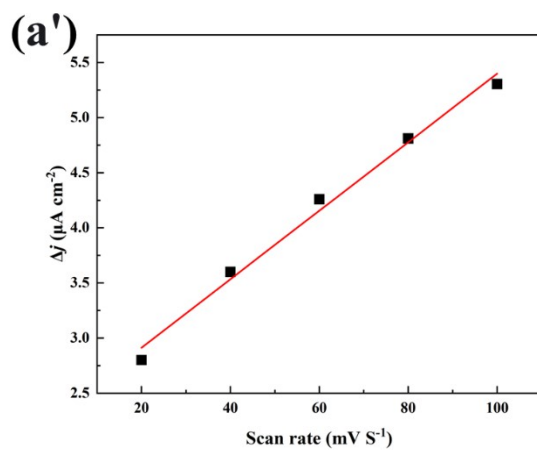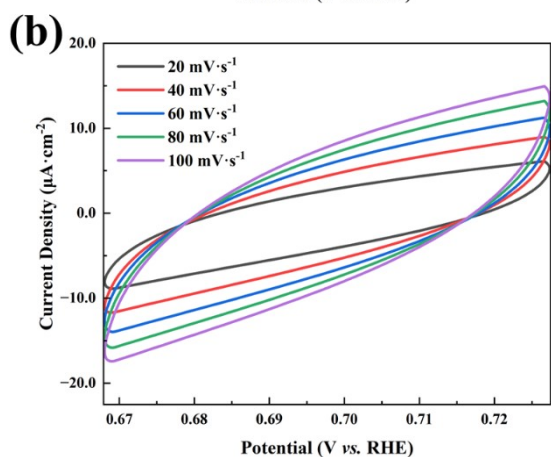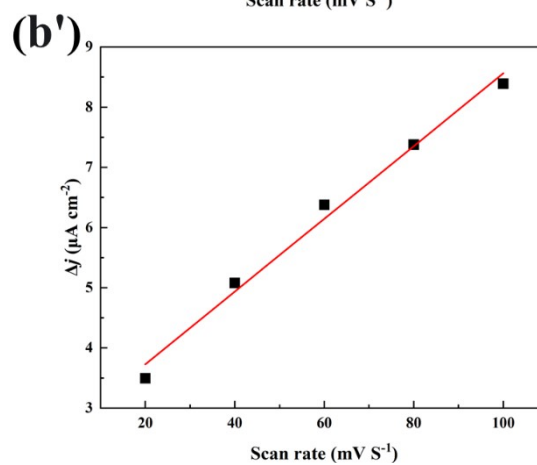



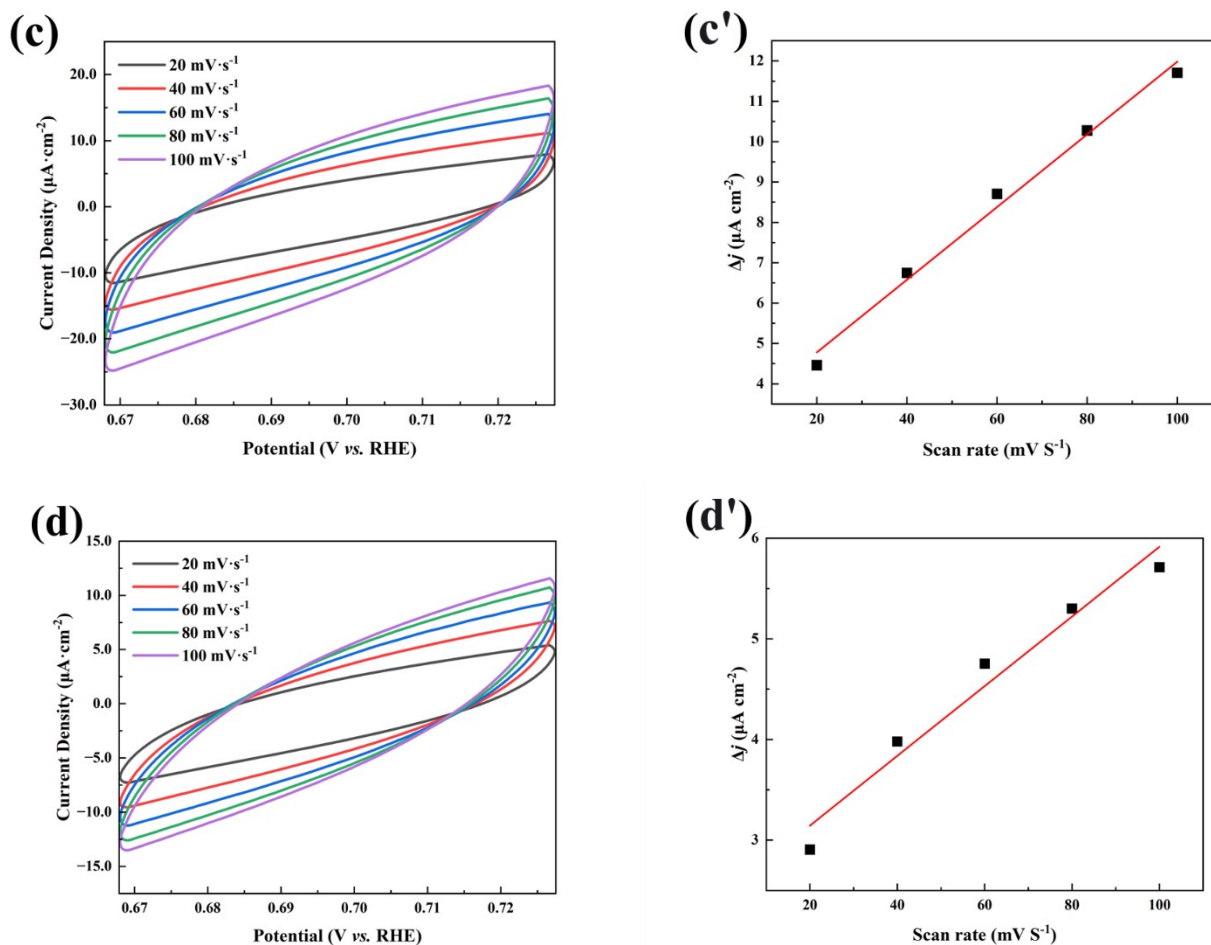

**Fig. S6.** CV curves at different scan rates of 20-100  $\text{mV}\cdot\text{s}^{-1}$  for (a) Cu-MOF74/Cu<sub>2</sub>O, (b) Cu-MOF74/Cu<sub>2</sub>O-250, (c) Cu-MOF74/Cu<sub>2</sub>O-350, (d) Cu-MOF74/Cu<sub>2</sub>O-450 and the corresponding double-layer capacitance ( $C_{dl}$ ).

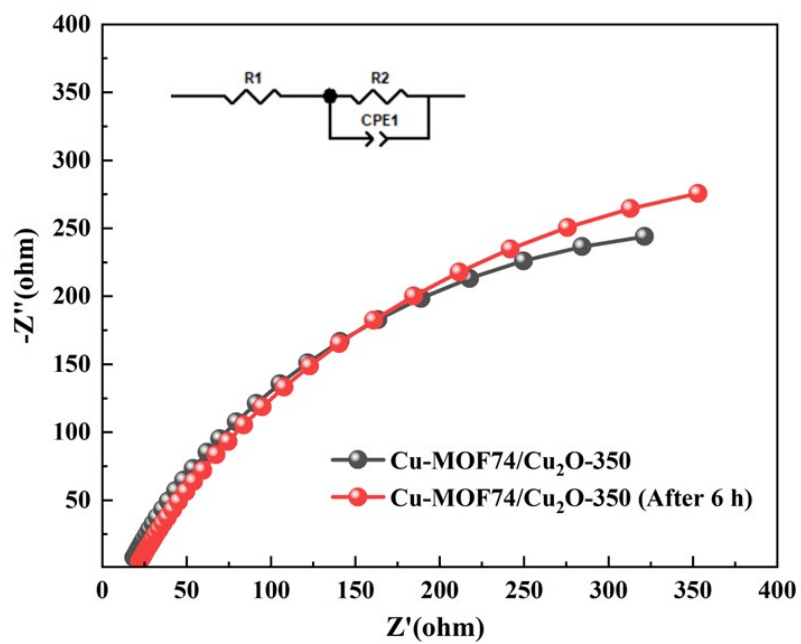

**Fig. S7.** Nyquist plots of Cu-MOF74/Cu<sub>2</sub>O-350 before and after 6 hours of continuous reaction.

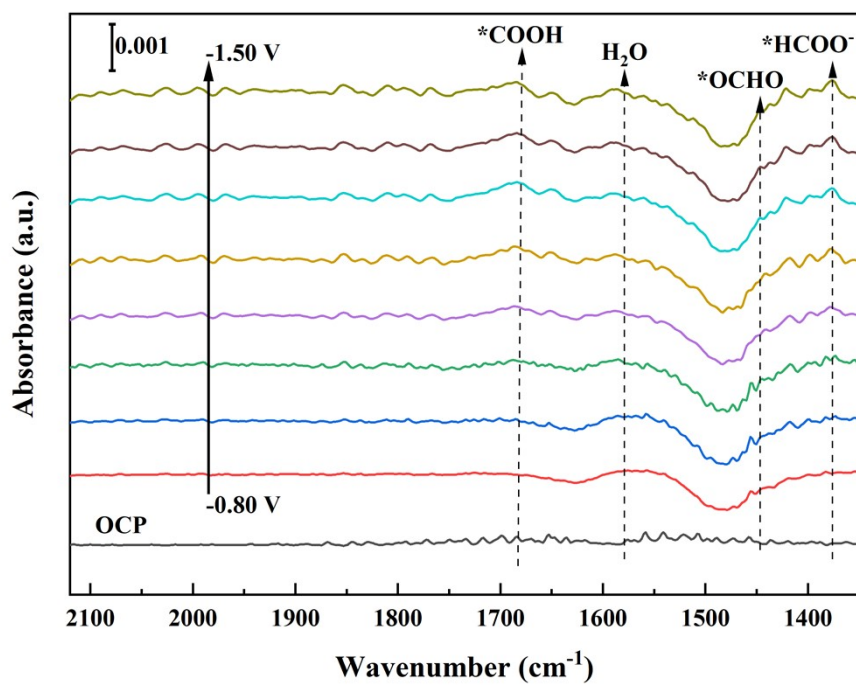

**Fig. S8.** *In situ* infrared spectra of Cu-MOF74-350 under different biases.

**Table S1.** Proportion of oxygen species on the surfaces of Cu<sub>2</sub>O-350, Cu-MOF74-350, and Cu-MOF74/Cu<sub>2</sub>O-350.

| Sample                         | O <sub>v</sub> % | O <sub>latt</sub> % | O <sub>ads</sub> % |
|--------------------------------|------------------|---------------------|--------------------|
| Cu <sub>2</sub> O-350          | 36.35            | 46.73               | 16.92              |
| Cu-MOF74-350                   | 28.92            | 48.00               | 23.08              |
| Cu-MOF74/Cu <sub>2</sub> O-350 | 22.08            | 55.99               | 21.93              |

**Table S2.** Specific surface area measurements of Cu-MOF74-350 and Cu-MOF74/Cu<sub>2</sub>O-350.

| Sample                         | BET specific surface area<br>m <sup>2</sup> /g | Average pore diameter<br>nm | Total pore volume<br>mL/g |
|--------------------------------|------------------------------------------------|-----------------------------|---------------------------|
| Cu-MOF74-350                   | 106.88                                         | 9.99                        | 0.41                      |
| Cu-MOF74/Cu <sub>2</sub> O-350 | 59.98                                          | 16.62                       | 0.18                      |

**Table S3.** Comparison of CO<sub>2</sub>RR performance with other copper-based electrocatalysts.

| Catalyst                                      | Electrolyte                       | Potential<br>/(V vs.<br>RHE) | FE%(C <sub>2</sub> H <sub>4</sub> ) | Ref.                 |
|-----------------------------------------------|-----------------------------------|------------------------------|-------------------------------------|----------------------|
| Cu porphyrin                                  | 0.5 M<br>KHCO <sub>3</sub>        | -0.976                       | 17%                                 | [1]                  |
| Cu<br>phthalocyanine                          | 0.5 M KCl                         | -1.7                         | 25%                                 | [2]                  |
| HKUST-1<br>+ Cu<br>nanoparticle               | 0.5 M<br>NaHCO <sub>3</sub>       | -2.0                         | 12%                                 | [3]                  |
| Cu <sub>2</sub> O/NRGO                        | 0.1 M<br>KHCO <sub>3</sub>        | -1.4                         | 19.7%                               | [4]                  |
| Cu <sub>2</sub> O/ILGS-100                    | 0.1 M<br>KHCO <sub>3</sub>        | -1.15                        | 31.1%                               | [5]                  |
| 3% SnO <sub>2</sub> -CuO<br>NS                | 0.5 M<br>KHCO <sub>3</sub>        | -1.0                         | 22.0%                               | [6]                  |
| Fe-TCPP@Cu                                    | 0.5 M<br>KHCO <sub>3</sub>        | -1.17                        | 33.42%                              | [7]                  |
| <b>Cu-<br/>MOF74/Cu<sub>2</sub>O-<br/>350</b> | <b>0.1 M<br/>KHCO<sub>3</sub></b> | <b>-1.30</b>                 | <b>32.48%</b>                       | <b>This<br/>work</b> |

## References

1. Z. Weng, J. Jiang, Y. Wu, Z. Wu, X. Guo, K. L. Materna, W. Liu, V. S. Batista, G. W. Brudvig and H. Wang, Electrochemical CO<sub>2</sub> reduction to hydrocarbons on a heterogeneous molecular Cu catalyst in aqueous solution, *Journal of the American Chemical Society*, 2016, **138**, 8076-8079.
2. S. Kusama, T. Saito, H. Hashiba, A. Sakai and S. Yotsuhashi, Crystalline copper(II) phthalocyanine catalysts for electrochemical reduction of carbon dioxide in aqueous media, *ACS Catalysis*, 2017, **7**, 8382-8385.
3. Y.-L. Qiu, H.-X. Zhong, T.-T. Zhang, W.-B. Xu, P.-P. Su, X.-F. Li and H.-M. Zhang, Selective electrochemical reduction of carbon dioxide using Cu based metal organic framework for CO<sub>2</sub> capture, *ACS Applied Materials & Interfaces*, 2018, **10**, 2480-2489.
4. H. Ning, Q. Mao, W. Wang, Z. Yang, X. Wang, Q. Zhao, Y. Song and M. Wu, N-doped reduced graphene oxide supported Cu<sub>2</sub>O nanocubes as high active catalyst for CO<sub>2</sub> electroreduction to C<sub>2</sub>H<sub>4</sub>, *Journal of Alloys and Compounds*, 2019, **785**, 7-12.
5. W. Wang, H. Ning, Z. Yang, Z. Feng, J. Wang, X. Wang, Q. Mao, W. Wu, Q. Zhao, H. Hu, Y. Song and M. Wu, Interface-induced controllable synthesis of Cu<sub>2</sub>O nanocubes for electroreduction CO<sub>2</sub> to C<sub>2</sub>H<sub>4</sub>, *Electrochimica Acta*, 2019, **306**, 360-365.
6. Y. Lan, G. Niu, F. Wang, D. Cui and Z. Hu, SnO<sub>2</sub>-modified two-dimensional CuO for enhanced electrochemical reduction of CO<sub>2</sub> to C<sub>2</sub>H<sub>4</sub>, *ACS Applied Materials & Interfaces*, 2020, **12**, 36128-36136.
7. T. Yan, J.-H. Guo, Z.-Q. Liu and W.-Y. Sun, Metalloporphyrin encapsulation for enhanced conversion of CO<sub>2</sub> to C<sub>2</sub>H<sub>4</sub>, *ACS Applied Materials & Interfaces*, 2021, **13**, 25937-25945.
